# Supplementary material for: Regulating the coordination geometry of polyhedra in zero-dimensional metal halides for tunable emission
Source: Royal Society of Chemistry journal article supplement (doi:10.1039/d2nr06975j), 2023-01-01
Supplement: d2nr06975j1.pdf [file d2nr06975j1.pdf]

# Supplementary information

## **Regulating coordination geometry of polyhedron in zero-dimensional metal halides towards tunable emission**

Zhipeng Zhang<sup>‡</sup>, Jin-Feng Liao<sup>‡\*</sup>, Guichuan Xing<sup>\*</sup>

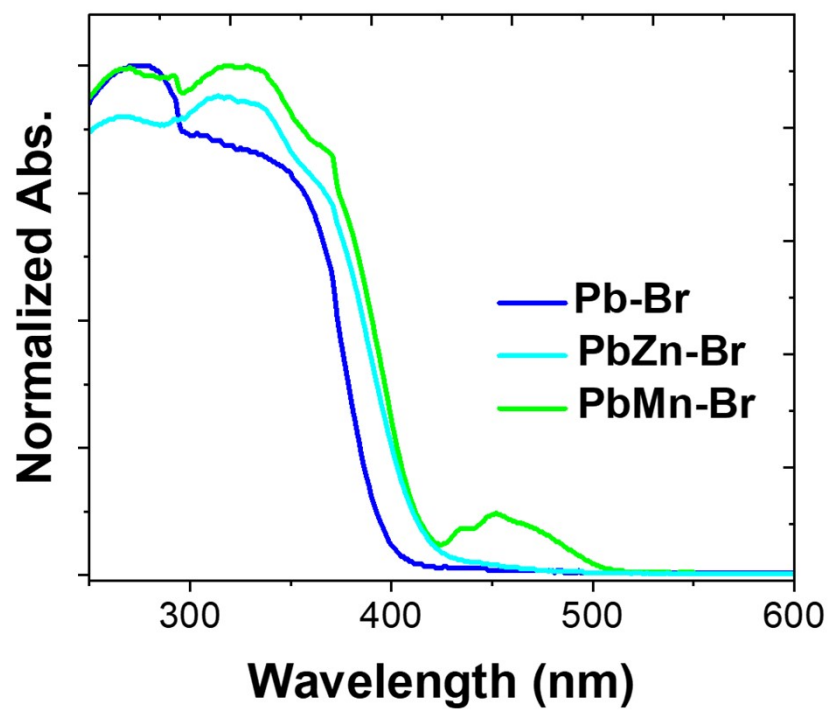

**Fig. S1.** UV-vis light absorption spectra of Pb-Br, PbZn-Br and PbMn-Br.

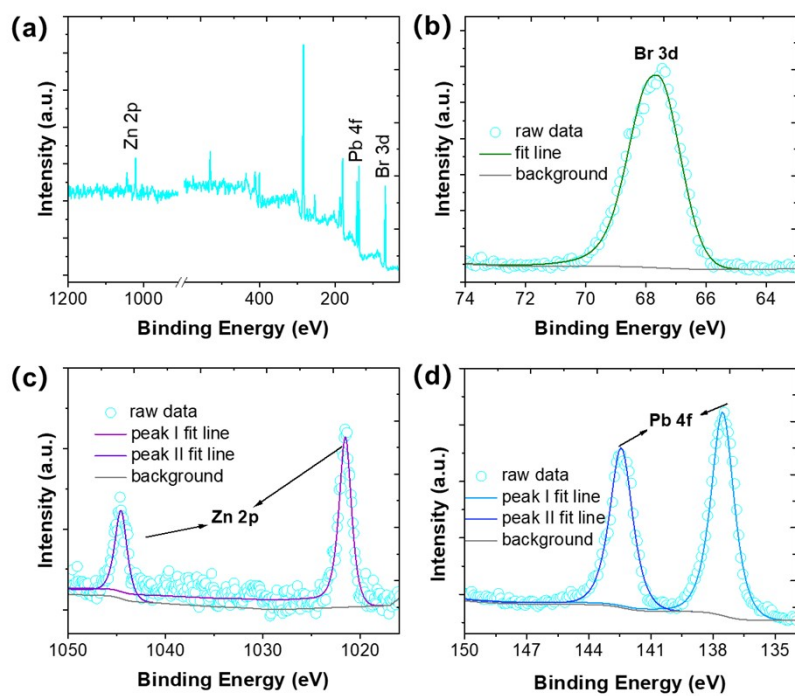

Fig. S2. (a) XPS survey, (b) Br 3d, (c) Zn 2p and (d) Pb 4f spectra of PbZn-Br.

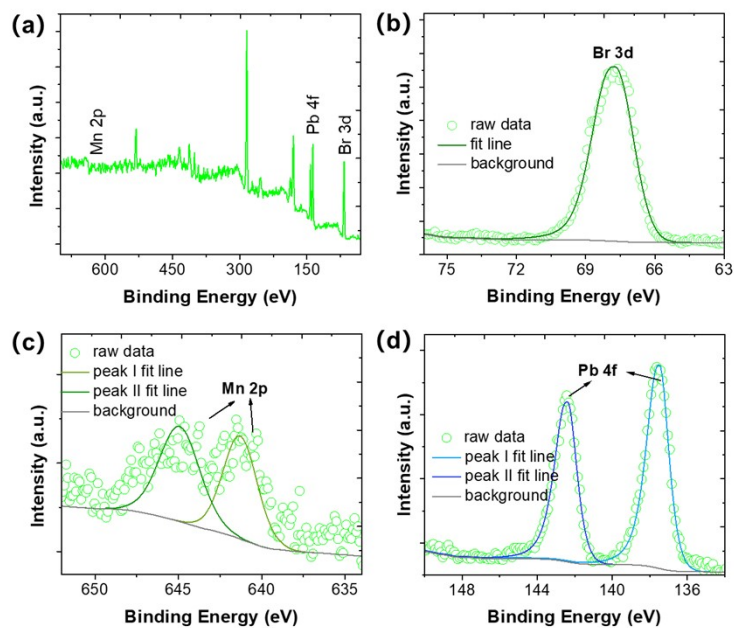

Fig. S3. (a) XPS survey, (b) Br 3d, (c) Mn 2p and (d) Pb 4f spectra of PbMn-Br.

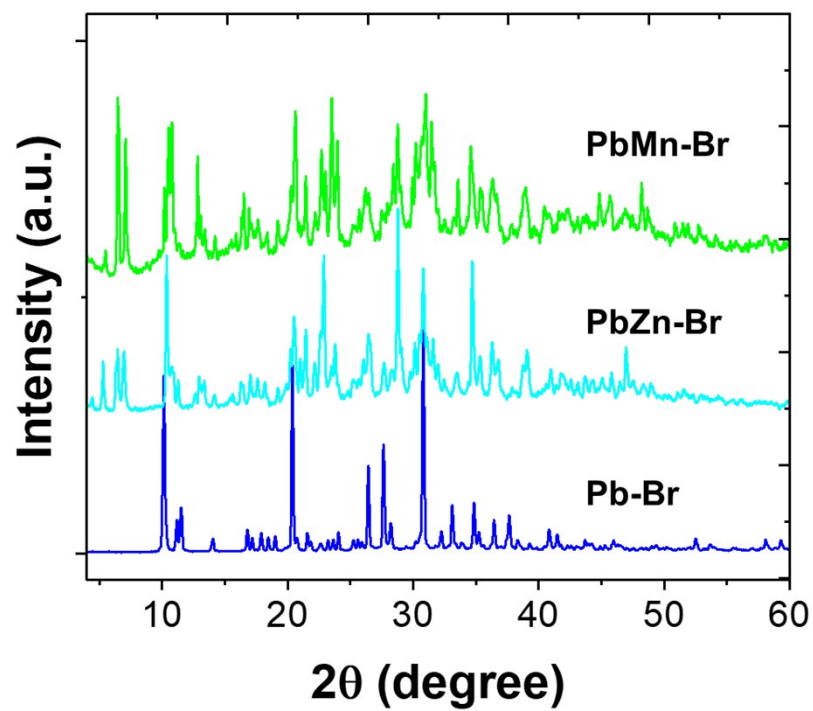

Fig. S4. Powder X-ray diffraction pattern of Pb-Br, PbZn-Br and PbMn-Br.

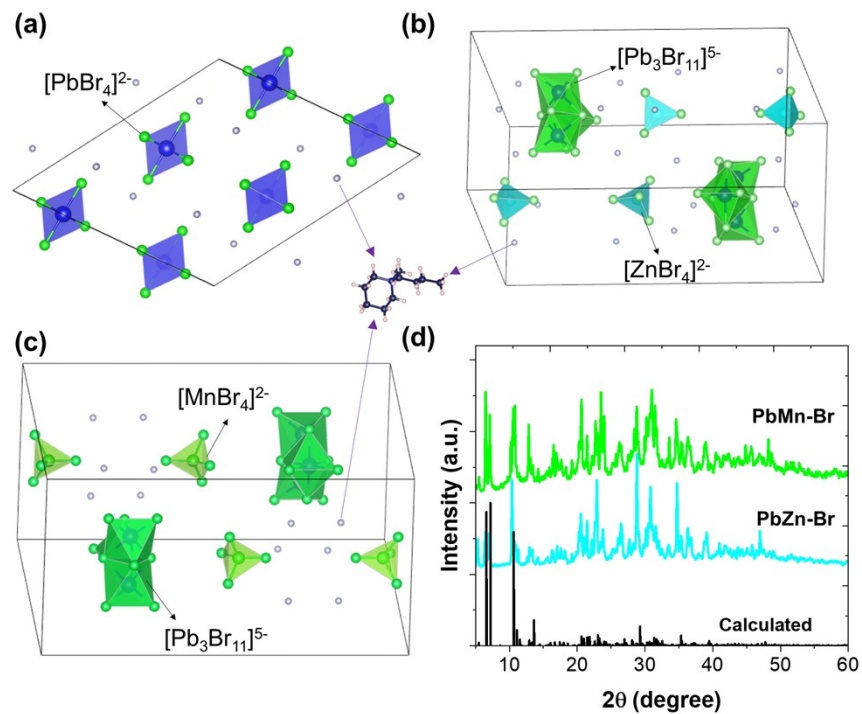

**Fig. S5.** Schematic view of the organic cation and ionic inorganic polyhedrons in a unit cell of (a) Pb-Br, (b) PbZn-Br and (c) PbMn-Br. (d) Comparison of the experimental powder X-ray diffraction pattern of PbZn-Br and PbMn-Br with the calculated result.

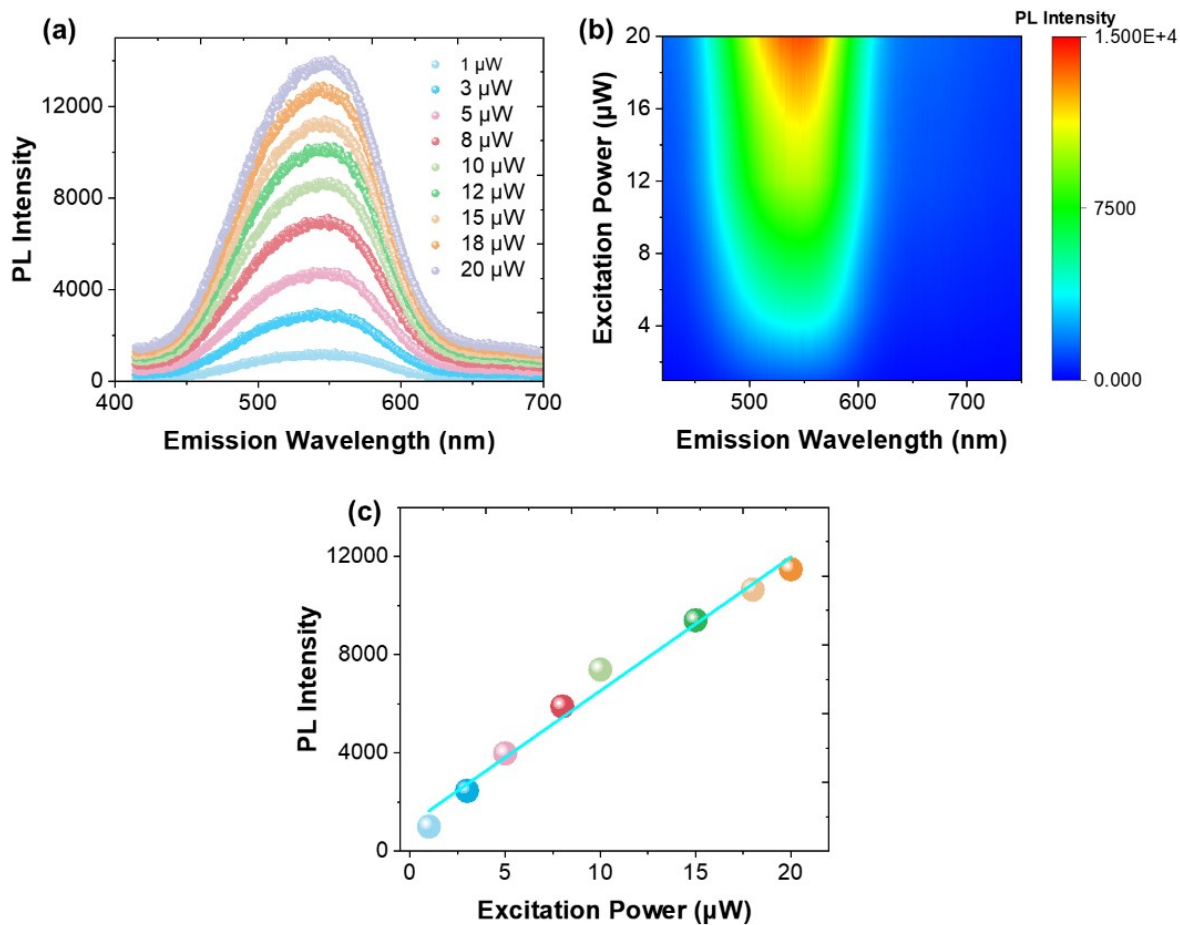

**Fig. S6.** (a) Excitation power dependent PL emission spectra of PbZn-Br. (b) The emission intensity of photoluminescence plotted as a function of excitation power.

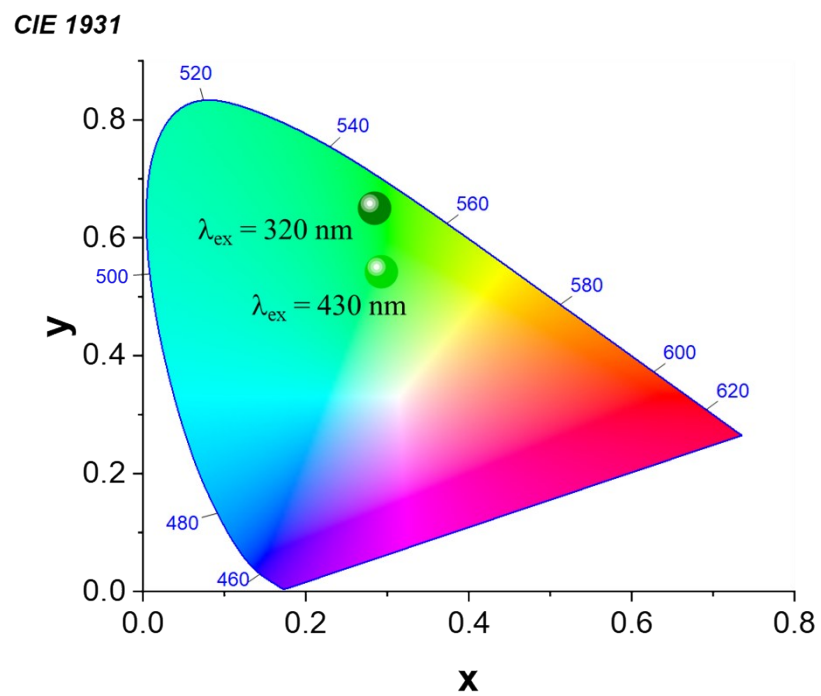

**Fig. S7.** CIE coordinates of PbMn-Br under excitation at 320 nm and 430 nm.

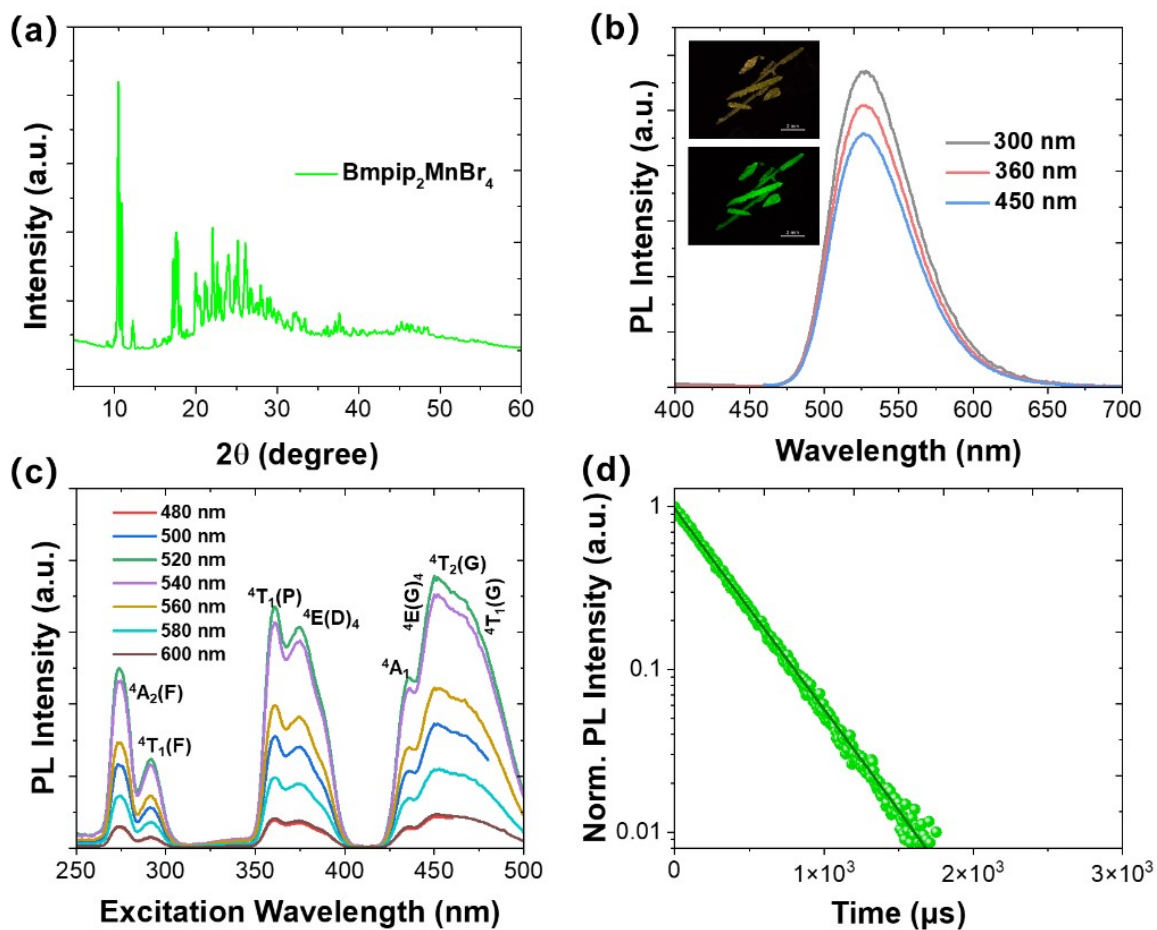

**Fig. S8.** Characterizations of  $\text{Bmpip}_2\text{MnBr}_4$ . (a) Powder XRD diffraction pattern. (b) PL emission spectra under excitation at 300 nm, 360 nm and 450 nm. Inset are the optical photographs of the single crystals under the conditions of natural light and UV irradiation (365 nm). (c) PLE spectra. (d) Time resolved PL emission decay.



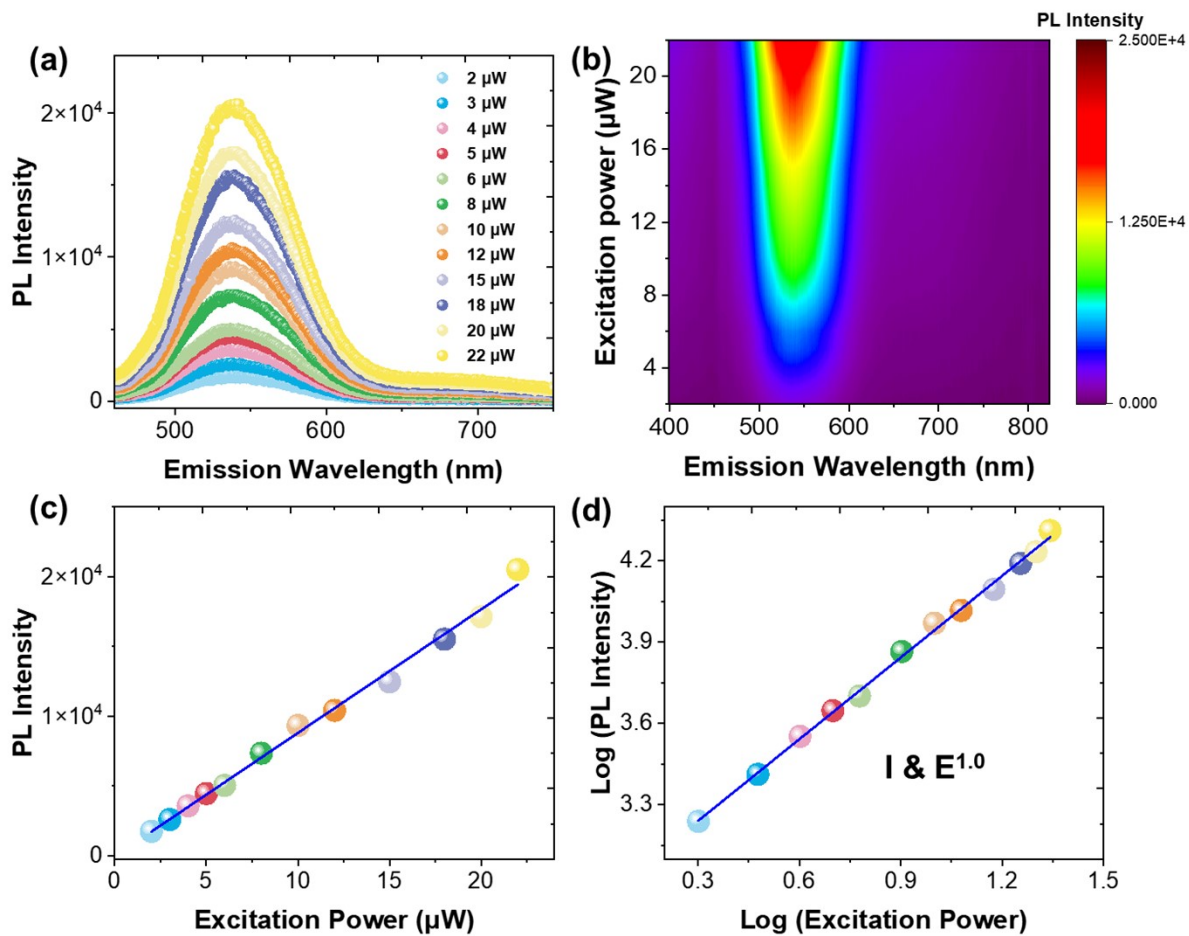

**Fig. S9.** (a) Excitation power dependent PL emission spectra of PbMn-Br. (b) Pseudocolor map of excitation power dependent emission spectra of PbMn-Br. (c) The emission intensity of photoluminescence plotted as a function of excitation power. (d) The plot of Log (PL Intensity) as a function of excitation power.

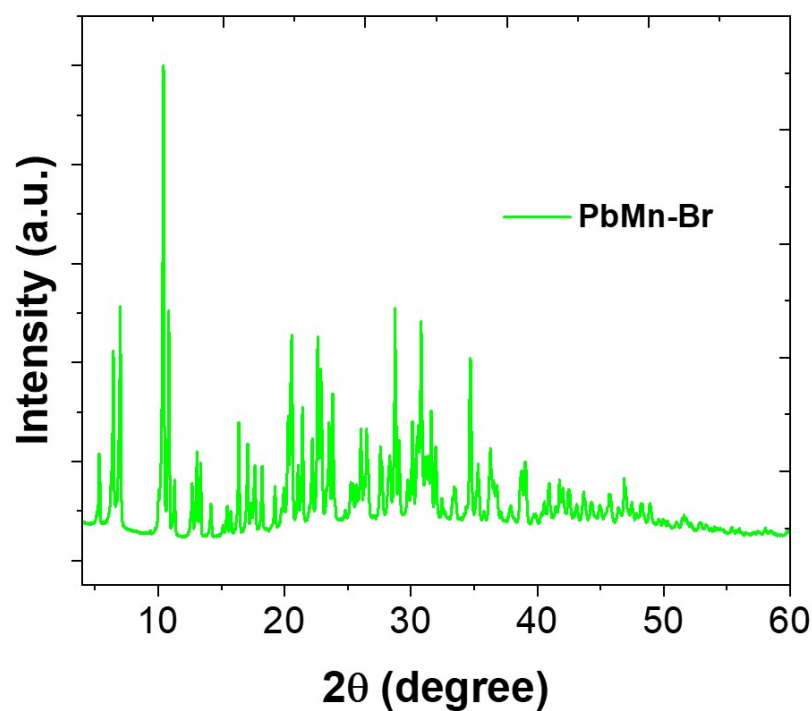

**Fig. S10.** Powder X-ray diffraction pattern of PbMn-Br after exposure in air for one year.

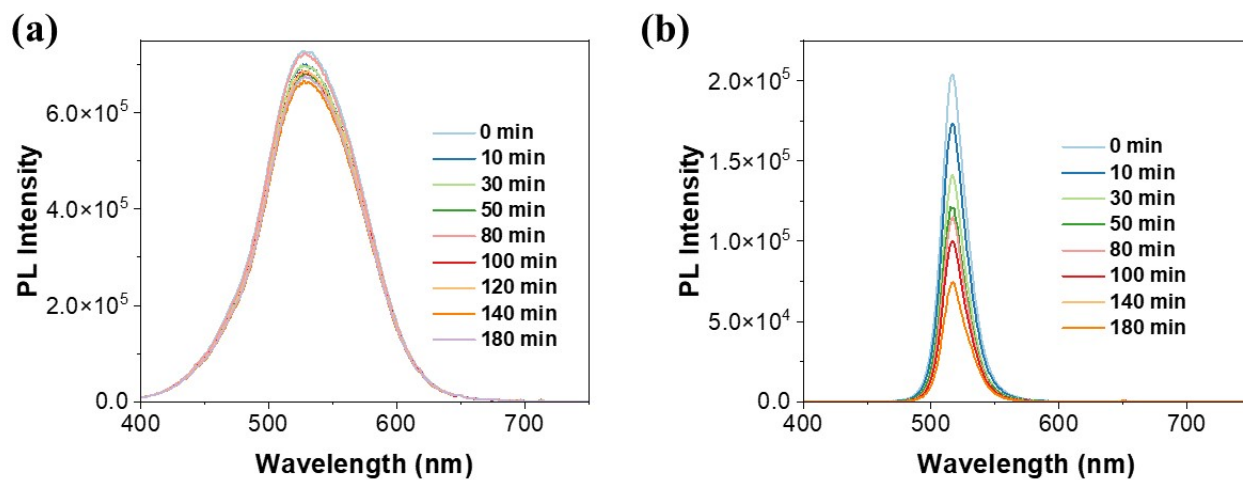

**Fig. S11.** PL emission spectra of (a) PbMn-Br and (b) CsPbBr<sub>3</sub> as a function of heat duration at 80°C.

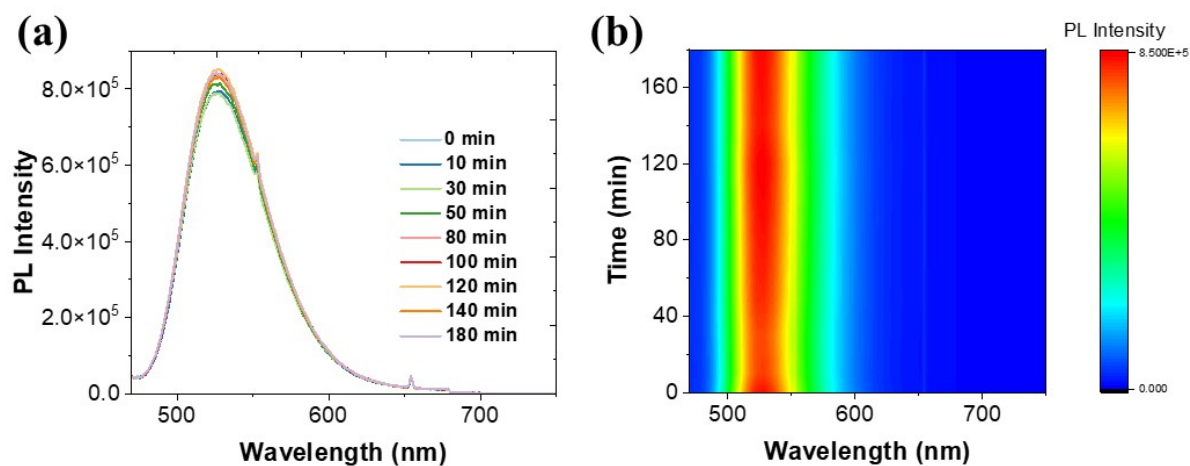

**Fig. S12.** (a) PL emission spectra and (b) pseudocolor map of time-dependent PL intensity of 450-nm-excited PbMn-Br under the heating of 80°C.

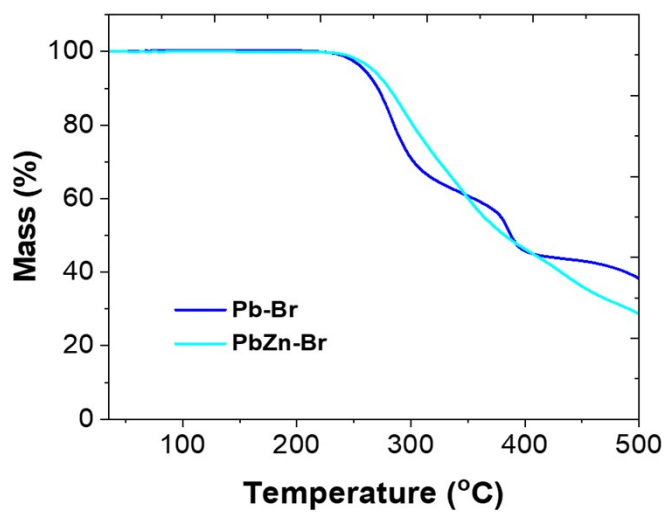

**Fig. S13.** Thermo-gravimetric analysis curves of Pb-Br and PbZn-Br.

**Table S1.** Crystal data and structure refinements for (Bmpip)<sub>2</sub>[PbBr<sub>4</sub>], (Bmpip)<sub>9</sub>[Pb<sub>3</sub>Br<sub>11</sub>](ZnBr<sub>4</sub>)<sub>2</sub> and (Bmpip)<sub>9</sub>[Pb<sub>3</sub>Br<sub>11</sub>](MnBr<sub>4</sub>)<sub>2</sub>.

| Compound                 | (Bmpip) <sub>2</sub> [PbBr <sub>4</sub> ] | (Bmpip) <sub>9</sub> [Pb <sub>3</sub> Br <sub>11</sub> ](ZnBr <sub>4</sub> ) <sub>2</sub> | (Bmpip) <sub>9</sub> [Pb <sub>3</sub> Br <sub>11</sub> ](MnBr <sub>4</sub> ) <sub>2</sub> |
|--------------------------|-------------------------------------------|-------------------------------------------------------------------------------------------|-------------------------------------------------------------------------------------------|
| Crystal system           | Monoclinic                                | Hexagonal                                                                                 | Trigonal                                                                                  |
| Space group              | C 2/c                                     | P 63/m                                                                                    | P 31/c                                                                                    |
| Unit cell dimensions     | a = 20.4084 Å                             | a = 15.1977 Å                                                                             | a = 15.2330 Å                                                                             |
|                          | b = 8.4516 Å                              | b = 15.1977 Å                                                                             | b = 15.2330 Å                                                                             |
|                          | c = 18.5924 Å                             | c = 31.6698 Å                                                                             | c = 31.8165 Å                                                                             |
|                          | α = 90.0000°                              | α = 90.0000°                                                                              | α = 90.0000°                                                                              |
|                          | β = 122.1860°                             | β = 90.0000°                                                                              | β = 90.0000°                                                                              |
|                          | γ = 90.0000°                              | γ = 120.0000°                                                                             | γ = 120.0000°                                                                             |
| Volume (Å <sup>3</sup> ) | 2714.06                                   | 6334.78                                                                                   | 6393.724                                                                                  |

**Table S2.** Photophysical property comparison between some reported multi-ionic metal halides.

|                                                                                                                      | PL Peak [nm]  | PLQY [%] | Lifetime              | Ref.      |
|----------------------------------------------------------------------------------------------------------------------|---------------|----------|-----------------------|-----------|
| (C <sub>9</sub> NH <sub>20</sub> ) <sub>9</sub> [Pb <sub>3</sub> Br <sub>11</sub> ](MnBr <sub>4</sub> ) <sub>2</sub> | 565           | 15.6     | 27.43 ns              | 1         |
| (C <sub>9</sub> NH <sub>20</sub> ) <sub>9</sub> [Pb <sub>3</sub> Br <sub>11</sub> ](FeBr <sub>4</sub> ) <sub>2</sub> | 565           | 2.44     | 3.95 ns               | 1         |
| (C <sub>9</sub> NH <sub>20</sub> ) <sub>9</sub> [Pb <sub>3</sub> Br <sub>11</sub> ](CoBr <sub>4</sub> ) <sub>2</sub> | 565           | 1.16     | 8.02 ns               | 1         |
| (C <sub>9</sub> NH <sub>20</sub> ) <sub>9</sub> [Pb <sub>3</sub> Br <sub>11</sub> ](ZnBr <sub>4</sub> ) <sub>2</sub> | 565           | 8.1      | 35.69 ns              | 1         |
| (HMTA) <sub>4</sub> PbMn <sub>0.69</sub> Sn <sub>0.31</sub> Br <sub>8</sub>                                          | 460, 550, 645 | 73       | 85 ns, 427 μs, 3.4 μs | 2         |
| (C <sub>10</sub> NH <sub>22</sub> ) <sub>2</sub> Pb <sub>1-x</sub> Sn <sub>x</sub> Br <sub>4</sub>                   | 470, 670      | 43.3     | 77 ns, 6 μs           | 3         |
| (bmpy) <sub>9</sub> [ZnBr <sub>4</sub> ] <sub>2</sub> [Pb <sub>3</sub> Br <sub>11</sub> ]                            | 564           | 7        | 36 ns                 | 4         |
| (C <sub>9</sub> NH <sub>20</sub> ) <sub>9</sub> Pb <sub>3</sub> Zn <sub>2</sub> Br <sub>19</sub>                     | 565           | 8.1      | 42 ns                 | 5         |
| Cs <sub>4</sub> MnBi <sub>2</sub> Cl <sub>12</sub>                                                                   | 610           | 25.7     | 144 μs                | 6         |
| (Bmpip) <sub>2</sub> Pb <sub>x</sub> Sn <sub>1-x</sub> Br <sub>4</sub>                                               | 470, 670      | 39       | 63.35 ns, 6.13 μs     | 7         |
| (bmpy) <sub>9</sub> [ZnCl <sub>4</sub> ] <sub>2</sub> [Pb <sub>3</sub> Cl <sub>11</sub> ]                            | 512           | ~100     | 540 ns                | 8         |
| PbMn-Br                                                                                                              | 534, 527      | 11, 67   | 36 ns, 240 μs         | this work |
| PbZn-Br                                                                                                              | 527           | 9        | 38 ns                 | this work |

## References:

1. M. Li, M. S. Molokeev, J. Zhao and Z. Xia, *Adv. Opt. Mater.*, 2020, **8**, 1902114.
2. L.-J. Xu, S. Lee, X. Lin, L. Ledbetter, M. Worku, H. Lin, C. Zhou, H. Liu, A. Plaviak and B. Ma, *Angew. Chem. Int. Ed.*, 2020, **59**, 14120-14123.
3. J.-F. Liao, Z. Zhang, J.-H. Wei, Z.-Z. Zhang, B. Wang, L. Zhou, G. Xing, Z. Tang and D.-B. Kuang, *Adv. Opt. Mater.*, 2022, **10**, 2102426.
4. S. Lee, C. Zhou, J. Neu, D. Beery, A. Arcidiacono, M. Chaaban, H. Lin, A. Gaiser, B. Chen, T. E. Albrecht-Schmitt, T. Siegrist and B. Ma, *Chem. Mater.*, 2020, **32**, 374-380.
5. M. Li, Y. Li, M. S. Molokeev, J. Zhao, G. Na, L. Zhang and Z. Xia, *Adv. Opt. Mater.*, 2020, **8**, 2000418.
6. J.-H. Wei, J.-F. Liao, X.-D. Wang, L. Zhou, Y. Jiang and D.-B. Kuang, *Matter*, 2020, **3**, 892-903.
7. L. Fan, K. Liu, Q. Zeng, M. Li, H. Cai, J. Zhou, S. He, J. Zhao and Q. Liu, *ACS Appl. Mater. Interfaces*, 2021, **13**, 29835-29842.
8. C. Zhou, H. Lin, J. Neu, Y. Zhou, M. Chaaban, S. Lee, M. Worku, B. Chen, R. Clark, W. Cheng, J. Guan, P. Djurovich, D. Zhang, X. Lü, J. Bullock, C. Pak, M. Shatruk, M.-H. Du, T. Siegrist and B. Ma, *ACS Energy Lett.*, 2019, **4**, 1579-1583.
